# Supplementary material for: Multitasking of Hsp70 chaperone in the biogenesis of bacterial functional amyloids
Source: PubMed Central journal article supplement (PMC6123696; doi:10.1038/s42003-018-0056-0), 2018-05-31
Supplement: 42003_2018_56_MOESM1_ESM.pdf [file 42003_2018_56_MOESM1_ESM.pdf]

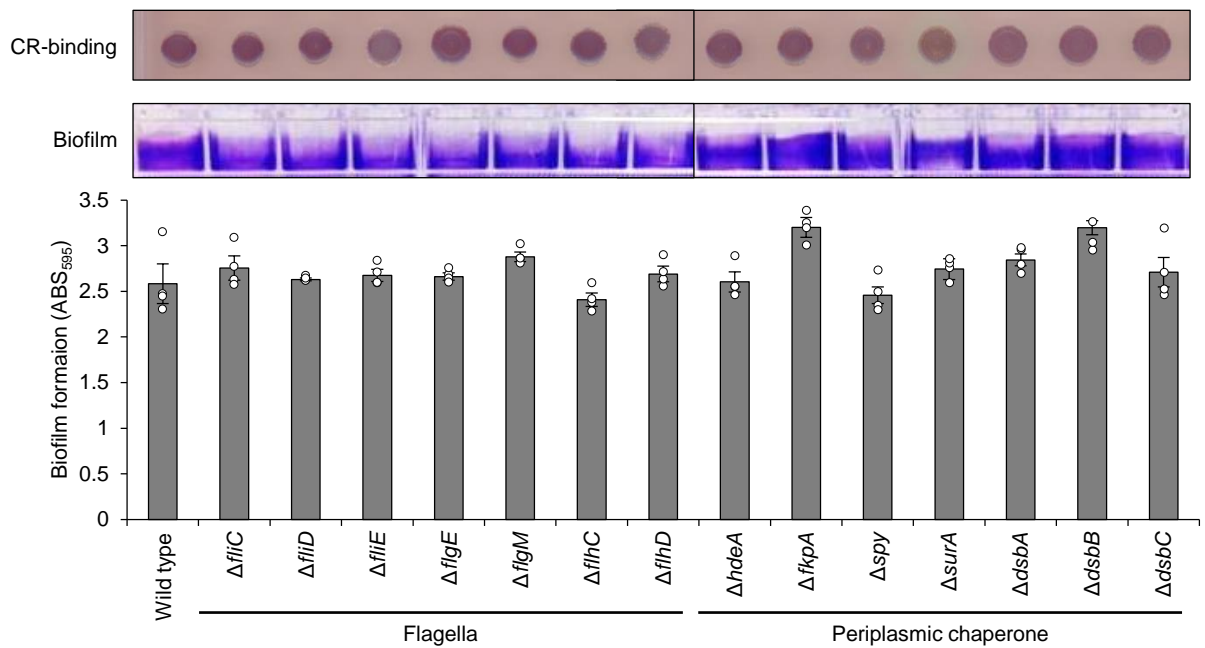

**Supplementary Figure 1** Biofilm formation and curli production by various *E. coli* mutants. Curli production and biofilm formation of BW25113 wild type and the indicated isogenic mutants lacking genes responsible for flagella production and protein quality control in periplasm were analysed by Congo Red (CR)-binding assay and crystal violet staining as shown in Figure 1. Experiments were repeated at least three times. Means and standard errors and data plots are shown.

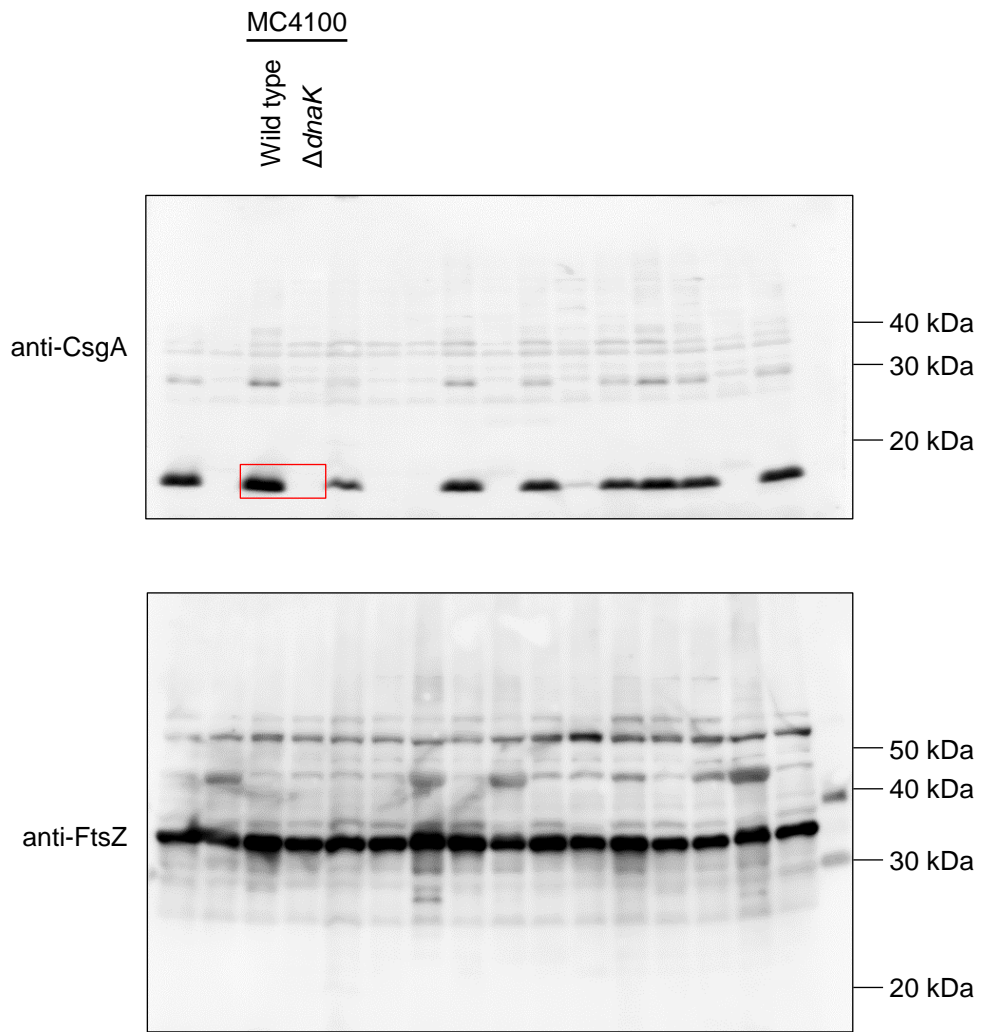

**Supplementary Figure 2** Full blots for detection of CsgA and FtsZ. Portions (red squares) are used in Figure 1c. The positions of molecular size markers are shown to the right of the blots.

**a**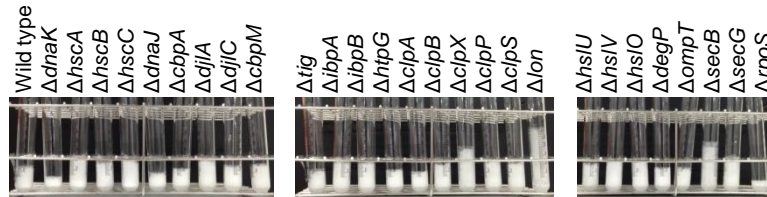**b**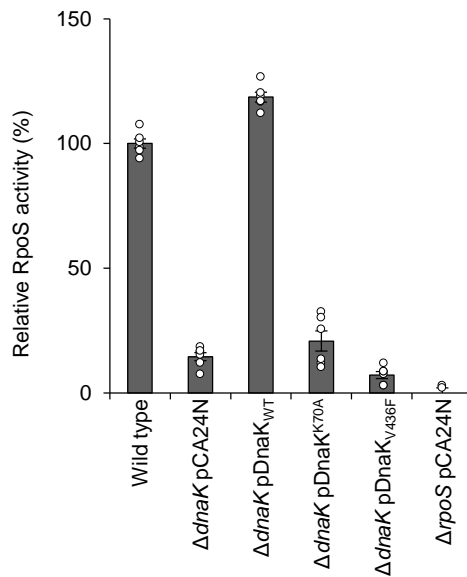

**Supplementary Figure 3** Catalase activity of various *E. coli* mutants. **a.** Catalase activities of the BW25113 wild-type and the isogenic mutant strains were analysed in the presence of H<sub>2</sub>O<sub>2</sub> and Triton X-100. Pictures of the foam formed by O<sub>2</sub> generation in the catalase reaction are shown. **b.** Relative RpoS activity in the indicated strains was analysed by measuring catalase activity as described in panel **a**. Experiments were repeated at least three times. Means and standard errors and data plots are shown.

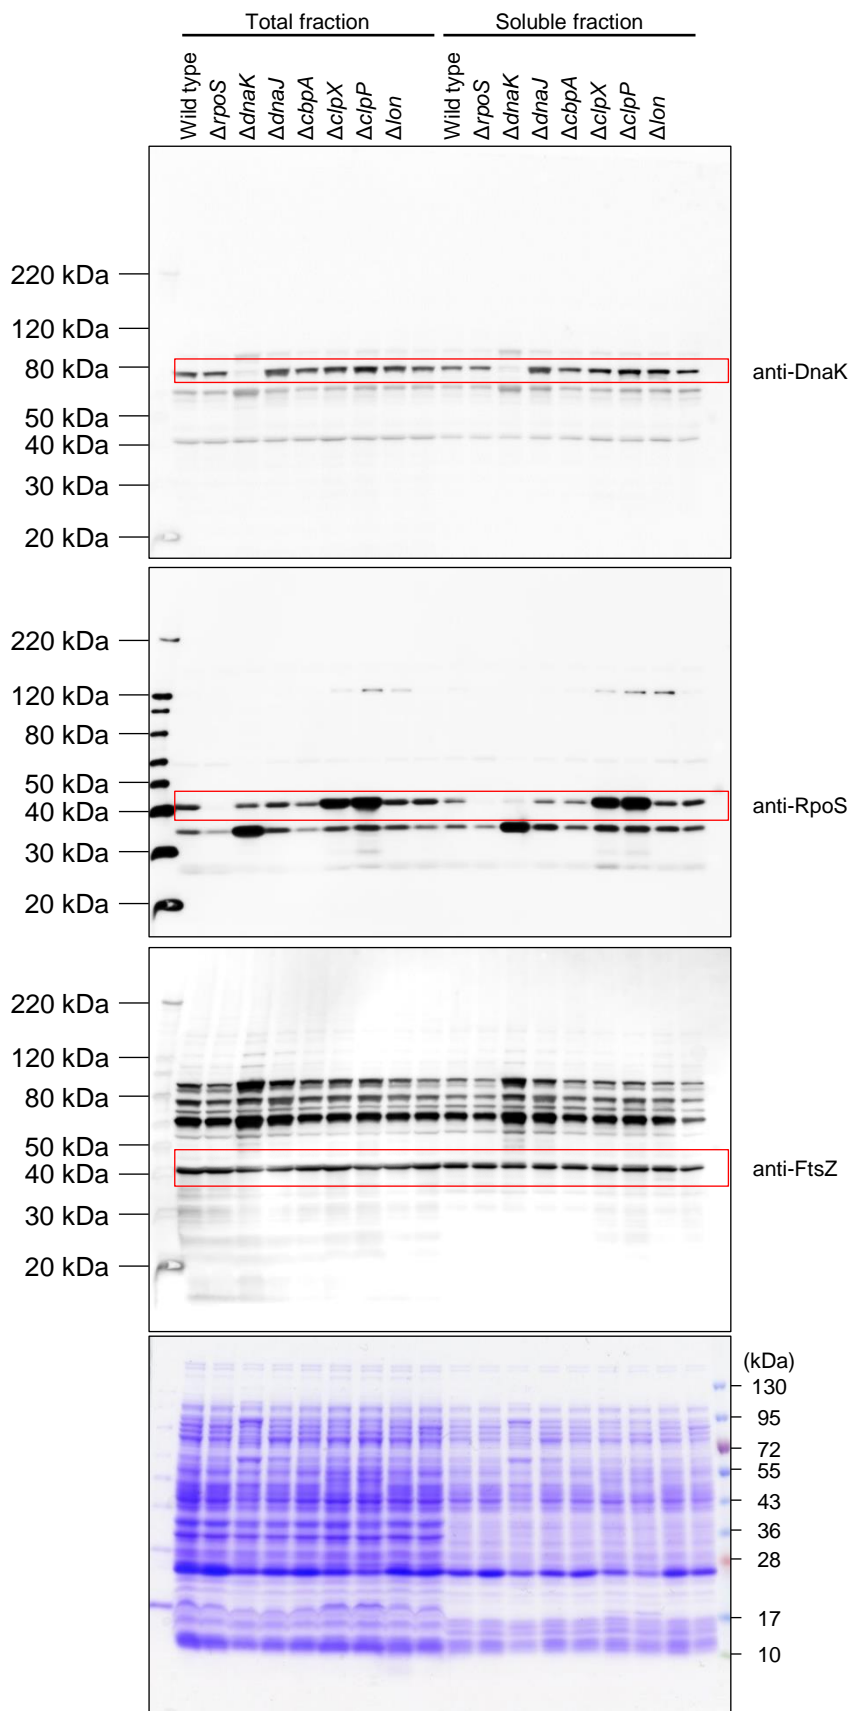

**Supplementary Figure 4** Full blots and gels for detection of DnaK, RpoS, FtsZ, and total proteins, respectively. Portions (red squares) are used in Figure 3a. The positions of molecular size markers are shown to the left and right of the blots and gel, respectively.

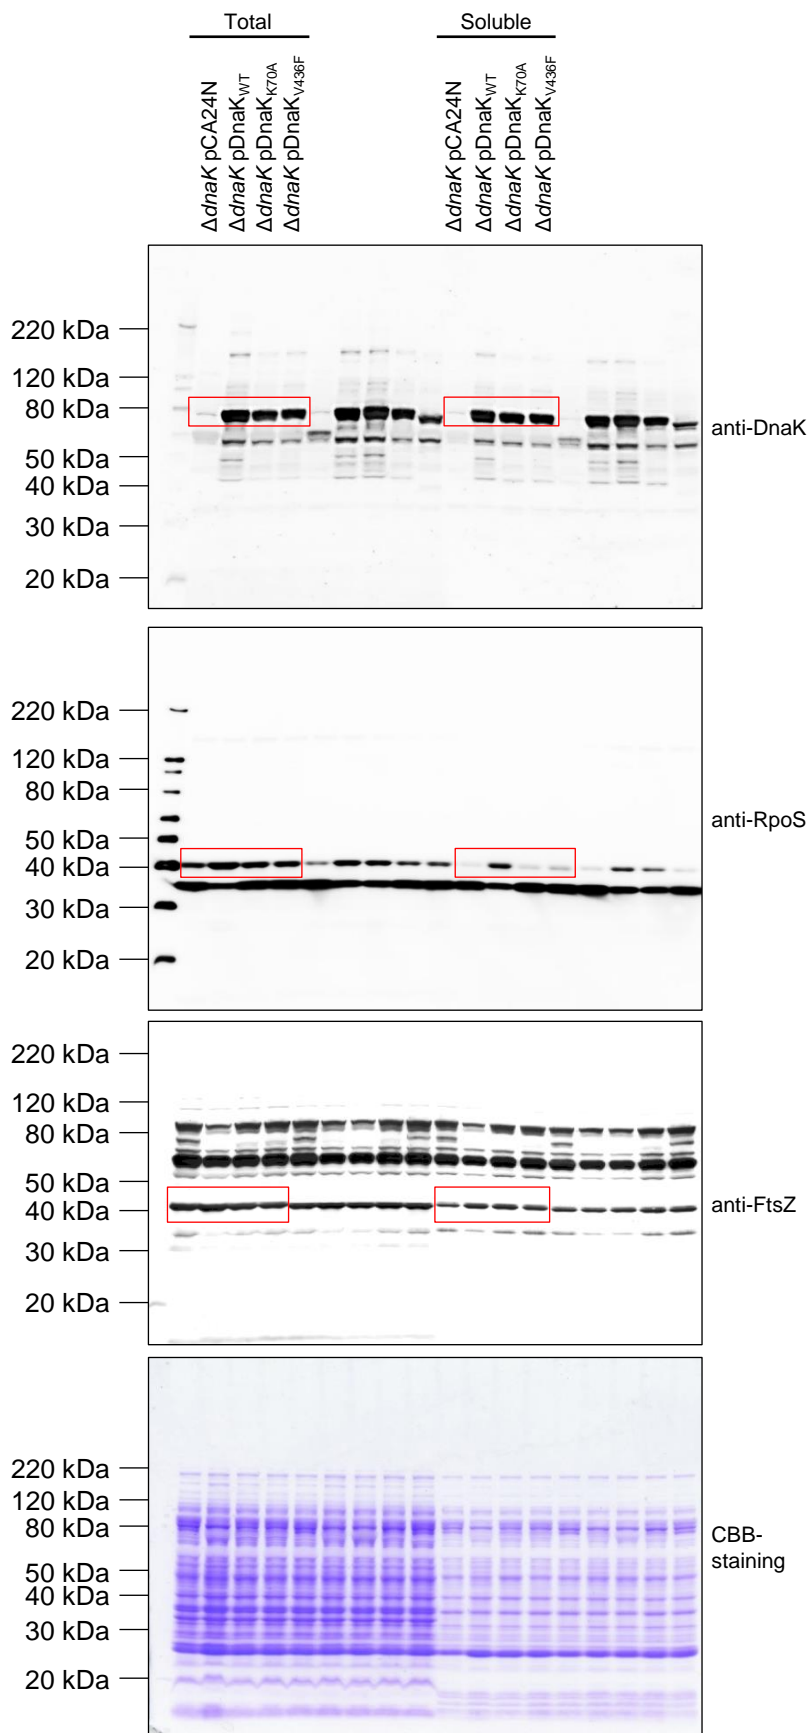

**Supplementary Figure 5** Full blots and gels for detection of DnaK, RpoS, FtsZ, and total proteins, respectively. Portions (red squares) are used in Figure 3b. The positions of molecular size markers are shown to the left of the blots and gel.

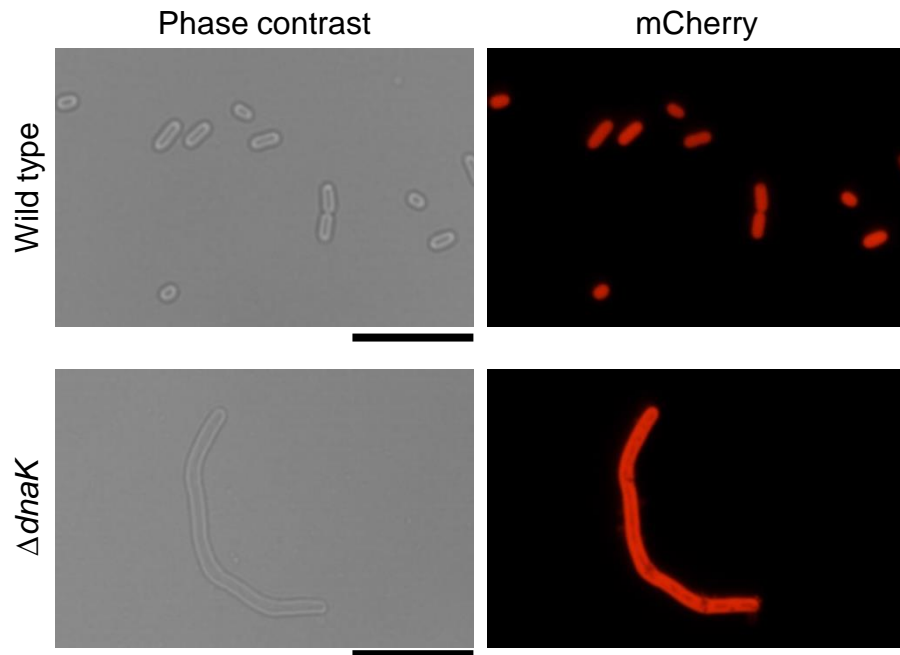

**Supplementary Figure 6** Observation of mCherry-expressing cells. Wild-type and  $\Delta dnaK$  cells harboring pCA24-mCherry were observed with fluorescence microscopy. Scales, 10  $\mu\text{m}$ .

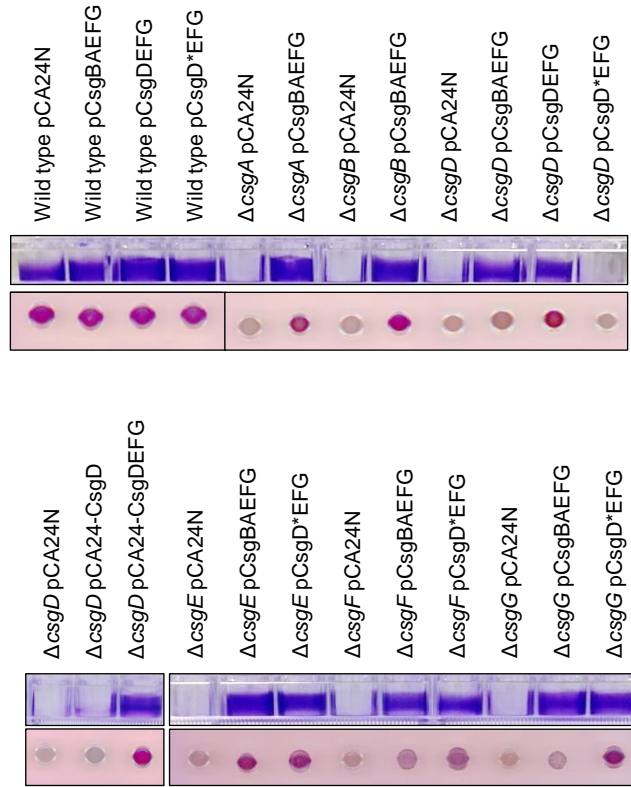

**Supplementary Figure 7** Effects of co-expression of *csgDEFG* and *csgBAEFG* on the biofilm formation and curli production in the respective *csg* mutants. Biofilm and curli production of the *E. coli* wild-type and *csg* mutant strains harboring the indicated plasmids were analysed by crystal violet staining and CR-binding assay as shown in Figure 1.

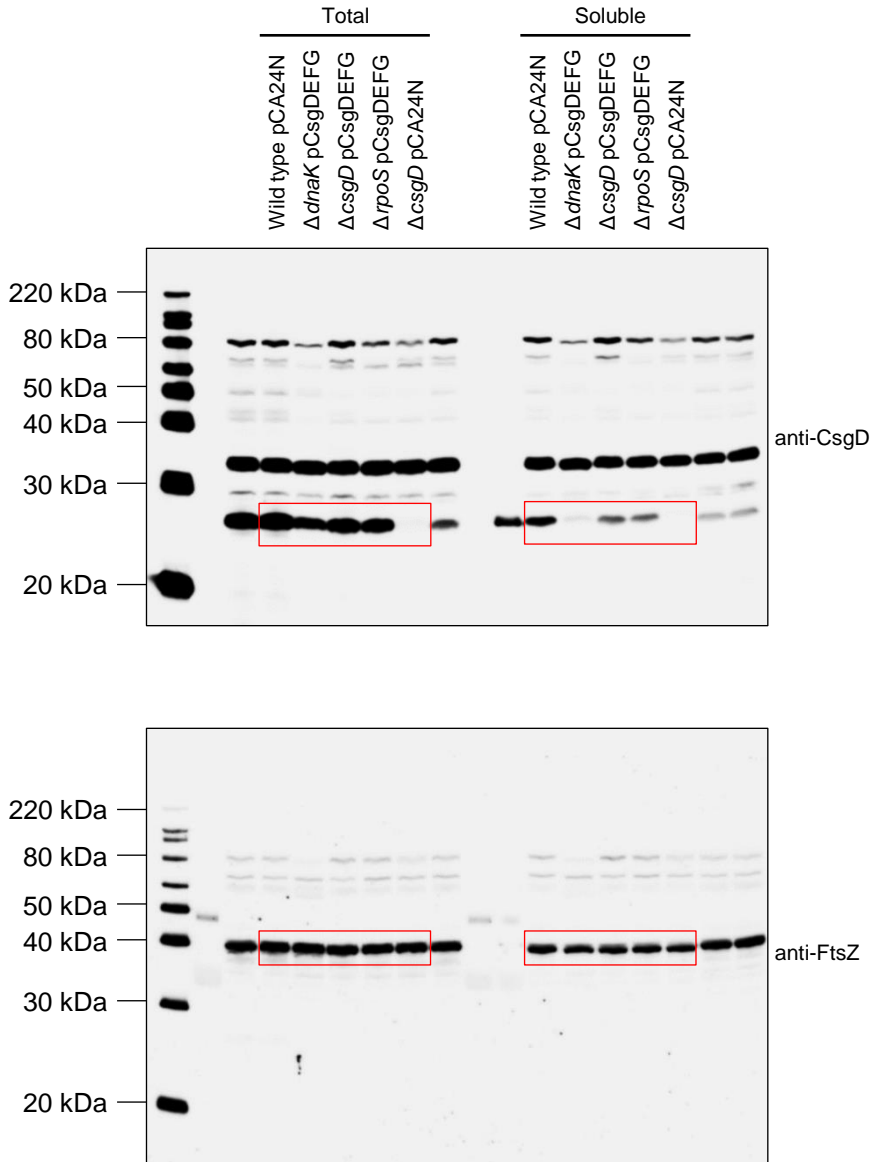

**Supplementary Figure 8** Full blots and gels for detection of CsgD and FtsZ. Portions (red squares) are used in Figure 4b. The positions of molecular size markers are shown to the left of the blots.



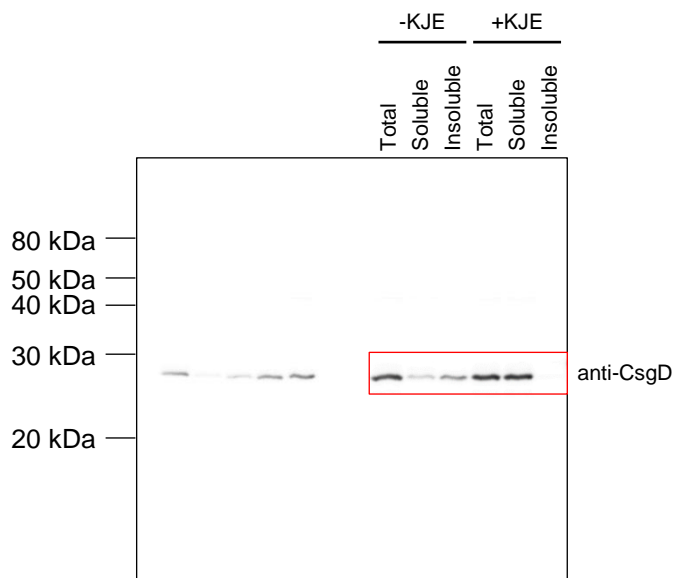

**Supplementary Figure 9** Full blots and gels for detection of CsgD. A portion (red squares) is used in Figure 4c. The positions of molecular size markers are shown to the left of the blot.

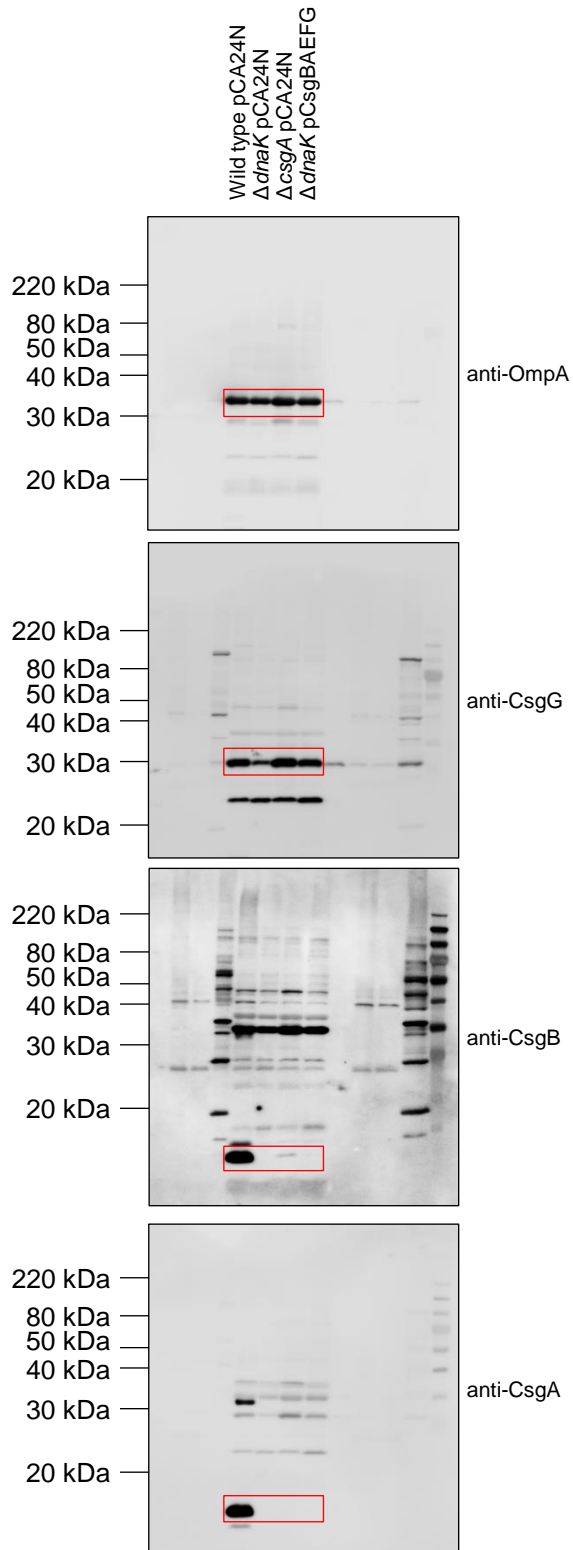

**Supplementary Figure 10** Full blots and gels for detection of OmpA, CsgG, CsgB, and CsgA. Portions (red squares) are used in Figure 5c. The positions of molecular size markers are shown to the left of the blots.

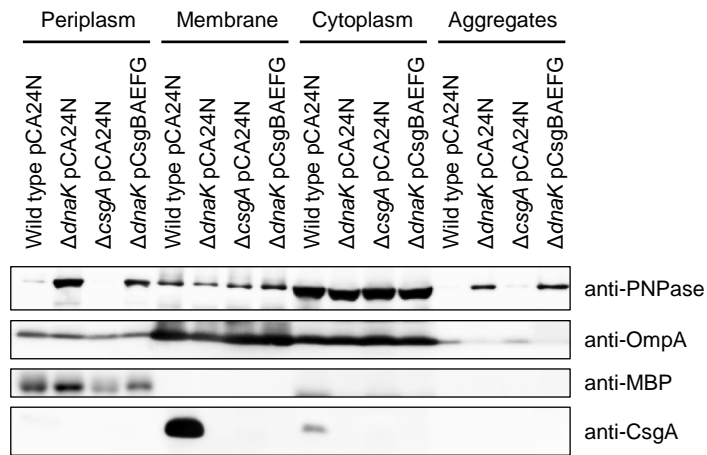

**Supplementary Figure 11** Cell fractionation of *E. coli*. After cell fractionation of the indicated, CsgA was detected by immunoblotting to check the cellular localization. To check accuracy of the fractionation, PNPase, OmpA, and MBP were also detected by immunoblotting as cytoplasmic, membrane, and periplasmic proteins, respectively.

**a**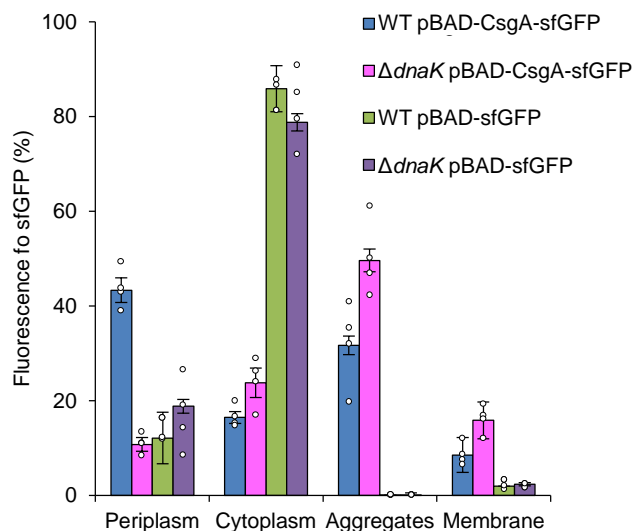**b**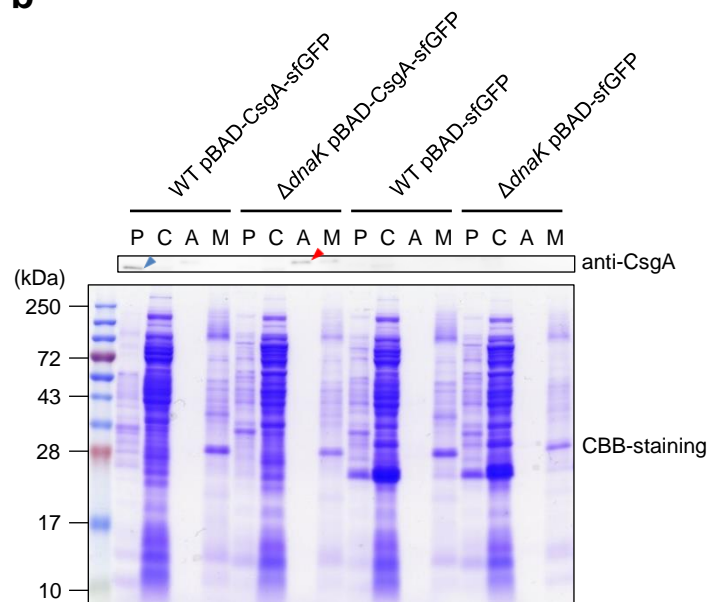

**Supplementary Figure 12** Accumulation of CsgA-sfGFP aggregates in the *dnaK* null mutant. **a.**

Fluorescence of CsgA-sfGFP in the cellular fractions isolated from the wild-type and  $\Delta dnaK$  strains was measured by fluorophotometer. As a control, sfGFP was also expressed in the strains. Percentages of the fluorescence intensities in each fraction with standard errors and data plots are shown. **b.** The fractionated CsgA-sfGFP was detected by immunoblotting using anti-CsgA antibody. Secretion precursor form and mature form of CsgA-sfGFP were indicated by red and blue arrowheads, respectively. In the wild type, CsgA-sfGFP mainly localized in the periplasm, while, in  $\Delta dnaK$ , it accumulated as aggregates in the cytoplasm. In contrast, sfGFP localized as a soluble form in the cytoplasm of both strains. P: periplasm, C: cytoplasm, A: aggregates, M: membrane. The positions of molecular size markers are shown to the left of the gel.

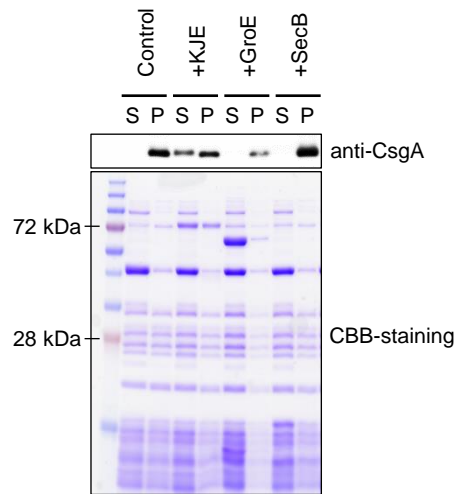

**Supplementary Figure 13** DnaK maintains CsgA as a soluble form in vitro. CsgA was synthesized by the cell-free translation system in the absence and presence of DnaK-DnaJ-GrpE (KJE), GroEL/ES (GroE), and SecB. Proteins were separated into the supernatant (S) and pellet (P) fractions by centrifugation and CsgA was detected by immunoblotting. An SDS-PAGE gel was also stained with CBB. The positions of molecular size markers are shown to the left of the gel.

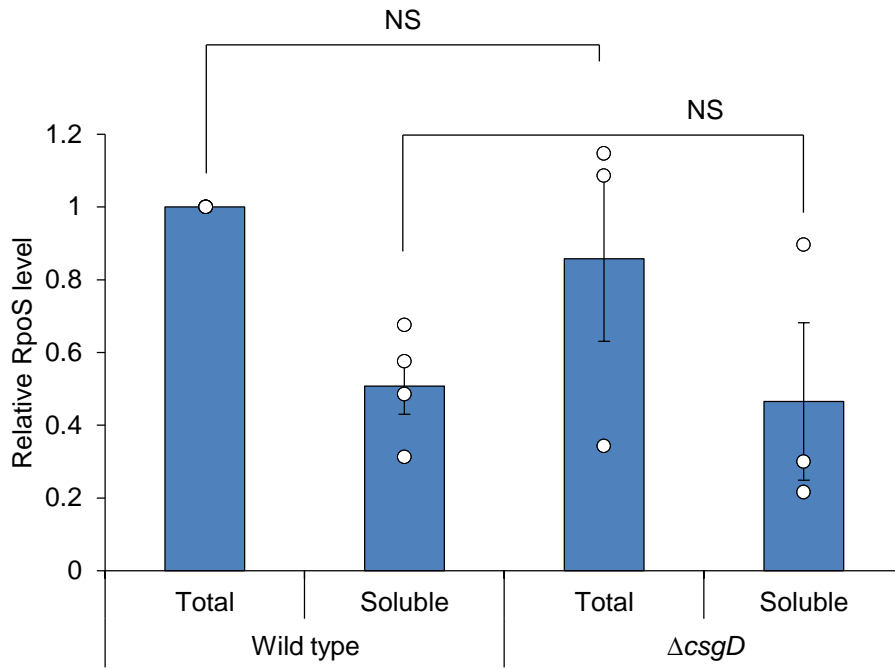

**Supplementary Figure 14** RpoS levels in wild type and  $\Delta csgD$ . Band intensities of RpoS in Western blotting data (e.g., Figure 3a) are quantified with Image Quant LAS400 Image Analyzer. Means and standard errors and data plots are shown. NS, not significant.

**Supplementary Table 1. Strains and plasmids used in this study**

| Strains and plasmids          | Description                                                                                                                                                                                                                                                                                                         | References |
|-------------------------------|---------------------------------------------------------------------------------------------------------------------------------------------------------------------------------------------------------------------------------------------------------------------------------------------------------------------|------------|
| <b><i>E. coli</i> strains</b> |                                                                                                                                                                                                                                                                                                                     |            |
| DH5 $\alpha$                  | <i>F</i> <sup>-</sup> , $\Phi$ 80 <i>dlacZ</i> $\Delta$ M15, $\Delta$ ( <i>lacZYA-argF</i> )U169, <i>deoR</i> , <i>recA1</i> , <i>endA1</i> , <i>hsdR17</i> ( <i>rK</i> <sup>-</sup> , <i>mK</i> <sup>+</sup> ), <i>phoA</i> , <i>supE44</i> , $\lambda$ <sup>-</sup> , <i>thi-1</i> , <i>gyrA96</i> , <i>relA1</i> | Toyobo     |
| JM109                         | <i>recA1 endA1 gyrA96 thi hsdR17</i> ( <i>rK</i> <sup>-</sup> <i>mK</i> <sup>+</sup> ) <i>e14</i> <sup>-</sup> ( <i>mcrA</i> <sup>-</sup> ) <i>supE44 relA1</i> $\Delta$ ( <i>lac-proAB</i> )/F'[ <i>traD36 proAB+ lacI<sup>f</sup> lacZ</i> $\Delta$ M15]                                                          | Promega    |
| BL21(DE3)                     | <i>F</i> <sup>-</sup> <i>ompT hsdS<sub>B</sub></i> ( <i>r<sub>B</sub><sup>-</sup> m<sub>B</sub><sup>-</sup>) <i>gal</i>(<math>\lambda</math><i>cl857 ind1 Sam7 nin5 lacUV5-T7gene1</i>) <i>dcm</i> (DE3)</i>                                                                                                        | Promega    |
| MC4100                        | <i>F</i> <sup>-</sup> <i>araDI39</i> $\Delta$ ( <i>argF lac</i> )U169 <i>rpsL150 relA1 deoCl ptsF25 rpsR flbB5301</i>                                                                                                                                                                                               | 5          |
| BM271                         | MC4100 $\Delta$ <i>dnaK52</i> :: <i>Cm</i> <sup>R</sup>                                                                                                                                                                                                                                                             | 6          |
| BW25113                       | K-12 wild type strain of Keio collection                                                                                                                                                                                                                                                                            | 7          |
| JW0013-KC                     | BW25113 $\Delta$ <i>dnaK</i> :: <i>Km</i> <sup>R</sup>                                                                                                                                                                                                                                                              | 7          |
| JW0014-KC                     | BW25113 $\Delta$ <i>dnaJ</i> :: <i>Km</i> <sup>R</sup>                                                                                                                                                                                                                                                              | 7          |
| JW0052-KC                     | BW25113 $\Delta$ <i>surA</i> :: <i>Km</i> <sup>R</sup>                                                                                                                                                                                                                                                              | 7          |
| JW0054-KC                     | BW25113 $\Delta$ <i>djlA</i> :: <i>Km</i> <sup>R</sup>                                                                                                                                                                                                                                                              | 7          |
| JW0157-KC                     | BW25113 $\Delta$ <i>degP</i> :: <i>Km</i> <sup>R</sup>                                                                                                                                                                                                                                                              | 7          |
| JW0426-KC                     | BW25113 $\Delta$ <i>tig</i> :: <i>Km</i> <sup>R</sup>                                                                                                                                                                                                                                                               | 7          |
| JW0427-KC                     | BW25113 $\Delta$ <i>clpP</i> :: <i>Km</i> <sup>R</sup>                                                                                                                                                                                                                                                              | 7          |
| JW0428-KC                     | BW25113 $\Delta$ <i>clpX</i> :: <i>Km</i> <sup>R</sup>                                                                                                                                                                                                                                                              | 7          |
| JW0429-KC                     | BW25113 $\Delta$ <i>lon</i> :: <i>Km</i> <sup>R</sup>                                                                                                                                                                                                                                                               | 7          |
| JW0462-KC                     | BW25113 $\Delta$ <i>htpG</i> :: <i>Km</i> <sup>R</sup>                                                                                                                                                                                                                                                              | 7          |
| JW0554-KC                     | BW25113 $\Delta$ <i>ompT</i> :: <i>Km</i> <sup>R</sup>                                                                                                                                                                                                                                                              | 7          |

|           |                             |   |
|-----------|-----------------------------|---|
| JW0644-KC | BW25113 $\Delta djlC::Km^R$ | 7 |
| JW0645-KC | BW25113 $\Delta hscC::Km^R$ | 7 |
| JW0865-KC | BW25113 $\Delta clpS::Km^R$ | 7 |
| JW0866-KC | BW25113 $\Delta clpA::Km^R$ | 7 |
| JW0984-KC | BW25113 $\Delta cbpM::Km^R$ | 7 |
| JW0985-KC | BW25113 $\Delta cbpA::Km^R$ | 7 |
| JW1020-KC | BW25113 $\Delta csgG::Km^R$ | 7 |
| JW1021-KC | BW25113 $\Delta csgF::Km^R$ | 7 |
| JW1022-KC | BW25113 $\Delta csgE::Km^R$ | 7 |
| JW1023-KC | BW25113 $\Delta csgD::Km^R$ | 7 |
| JW1024-KC | BW25113 $\Delta csgB::Km^R$ | 7 |
| JW1025-KC | BW25113 $\Delta csgA::Km^R$ | 7 |
| JW1058-KC | BW25113 $\Delta flgM::Km^R$ | 7 |
| JW1063-KC | BW25113 $\Delta flgE::Km^R$ | 7 |
| JW1732-KC | BW25113 $\Delta spy::Km^R$  | 7 |
| JW1880-KC | BW25113 $\Delta flhC::Km^R$ | 7 |
| JW1881-KC | BW25113 $\Delta flhD::Km^R$ | 7 |
| JW1908-KC | BW25113 $\Delta fliC::Km^R$ | 7 |
| JW1909-KC | BW25113 $\Delta fliD::Km^R$ | 7 |
| JW1921-KC | BW25113 $\Delta fliE::Km^R$ | 7 |
| JW2510-KC | BW25113 $\Delta hscA::Km^R$ | 7 |



|                |                                                                   |         |
|----------------|-------------------------------------------------------------------|---------|
| JW2511-KC      | BW25113 $\Delta hscB::Km^R$                                       | 7       |
| JW2573-KC      | BW25113 $\Delta clpB::Km^R$                                       | 7       |
| JW2861-KC      | BW25113 $\Delta dsbC::Km^R$                                       | 7       |
| JW3142-KC      | BW25113 $\Delta secG::Km^R$                                       | 7       |
| JW3309-KC      | BW25113 $\Delta fkpA::Km^R$                                       | 7       |
| JW3478-KC      | BW25113 $\Delta hdeA::Km^R$                                       | 7       |
| JW3584-KC      | BW25113 $\Delta secB::Km^R$                                       | 7       |
| JW3663-KC      | BW25113 $\Delta ibpB::Km^R$                                       | 7       |
| JW3664-KC      | BW25113 $\Delta ibpA::Km^R$                                       | 7       |
| JW3832-KC      | BW25113 $\Delta dsbA::Km^R$                                       | 7       |
| JW3902-KC      | BW25113 $\Delta hslU::Km^R$                                       | 7       |
| JW3903-KC      | BW25113 $\Delta hslV::Km^R$                                       | 7       |
| JW4230-KC      | BW25113 $\Delta hfq::Km^R$                                        | 7       |
| JW4277-KC      | BW25113 $\Delta fimA::Km^R$                                       | 7       |
| JW4283-KC      | BW25113 $\Delta fimH::Km^R$                                       | 7       |
| JW5182-KC      | BW25113 $\Delta dsbB::Km^R$                                       | 7       |
| JW5437-KC      | BW25113 $\Delta rpoS::Km^R$                                       | 7       |
| JW5692-KC      | BW25113 $\Delta hslO::Km^R$                                       | 7       |
| <b>Plasmid</b> |                                                                   |         |
| pET-15b        | pET vector with N-terminal His <sub>6</sub> -tag, Ap <sup>R</sup> | Novagen |
| pET-28b        | pET vector with N-terminal His <sub>6</sub> -tag, Km <sup>R</sup> | Novagen |

|                        |                                                                                       |                   |
|------------------------|---------------------------------------------------------------------------------------|-------------------|
| pBAD33                 | Arabinose inducible expression vector                                                 | Clontech          |
| pBAD/Myc-His B         | Arabinose inducible expression vector with C-terminal Myc-His <sub>6</sub> -tag       | Life Technologies |
| pBAD/SS01              | Ara promoter, p15A <i>ori</i> ; Cm <sup>R</sup> , Ap <sup>R</sup>                     | This study        |
| pBAD/SS02              | Ara promoter, p15A <i>ori</i> ; Ap <sup>R</sup>                                       | This study        |
| pCA24N                 | Empty vector of ASKA clone, <i>lac</i> promoter ; pBR322 <i>ori</i> ; Cm <sup>R</sup> | 8                 |
| pCold I                | Cold shock promoter ; His <sub>6</sub> -tag gene ; ColE1 <i>ori</i> ; Ap <sup>R</sup> | Takara            |
| pDnaK <sub>WT</sub>    | <i>dnaK</i> cloned in pCA24N, N-terminal His <sub>6</sub> -tag, ASKA clone            | 8                 |
| pDnaK <sub>K70A</sub>  | N-terminally His <sub>6</sub> -tagged DnaK <sub>K70A</sub> cloned in pCA24N           | This study        |
| pDnaK <sub>V436F</sub> | N-terminally His <sub>6</sub> -tagged DnaK <sub>V436F</sub> gene cloned in pCA24N     | This study        |
| pRpoS                  | <i>rpoS</i> cloned in pCA24N                                                          | This study        |
| pRpoS-mCherry          | <i>rpoS::mcherry</i> cloned in pCA24N                                                 | This study        |
| pCA24-mCherry          | <i>mcherry</i> cloned in pCA24N                                                       | This study        |
| pASKA-CsgD             | <i>csgD</i> cloned in pCA24N, N-terminal His <sub>6</sub> -tag, ASKA clone            | 8                 |
| pCsgD                  | <i>csgD</i> cloned in pCA24N                                                          | This study        |
| pCsgDEFG               | <i>csgDEFG</i> cloned in pCA24N                                                       | This study        |
| pCsgD*EFG              | DNA-binding domain coding region was deleted from <i>csgD</i> in pCsgDEFG             | This study        |
| pCsgBAEFG              | <i>csgBA</i> and <i>csgEFG</i> tandemly cloned in pCA24N                              | This study        |
| pCsgA-His              | <i>csgA</i> cloned in pCA24N                                                          | This study        |
| pBAD-sfGFP             | <i>sfgfp</i> cloned in pBAD/SS02                                                      | This study        |
| pBAD-CsgA-sfGFP        | <i>csgA</i> cloned in pBAD-sfGFP                                                      | This study        |
| pBAD-CsgBA-sfGFP       | <i>csgBA</i> cloned in pBAD-sfGFP                                                     | This study        |

|                                     |                                                                                                 |            |
|-------------------------------------|-------------------------------------------------------------------------------------------------|------------|
| pBAD-CsgBA <sub>1-20</sub> -sfGFP   | <i>csgB</i> and <i>csgA</i> <sub>1-20</sub> cloned in pBAD-sfGFP                                | This study |
| pBAD-CsgBA <sub>1-42</sub> -sfGFP   | <i>csgB</i> and <i>csgA</i> <sub>1-42</sub> cloned in pBAD-sfGFP                                | This study |
| pBAD-CsgBA <sub>21-42</sub> -sfGFP  | <i>csgB</i> and <i>csgA</i> <sub>21-42</sub> cloned in pBAD-sfGFP                               | This study |
| pBAD-CsgBA <sub>21-151</sub> -sfGFP | <i>csgB</i> and <i>csgA</i> <sub>21-151</sub> cloned in pBAD-sfGFP                              | This study |
| pBAD-CsgBA <sub>43-151</sub> -sfGFP | <i>csgB</i> and <i>csgA</i> <sub>43-151</sub> cloned in pBAD-sfGFP                              | This study |
| pBAD-CsgBA <sub>slowgo</sub> -sfGFP | <i>csgB</i> and <i>csgA</i> <sub>slowgo</sub> caring Q49A/N54A/Q139A/N144A cloned in pBAD-sfGFP | This study |
| pBAD-CsgB-mCherry/CsgA-sfGFP        | <i>mcherry</i> cloned in pBAD-CsgBA-sfGFP                                                       | This study |
| pBAD-CsgD-Myc-His                   | <i>csgD</i> cloned in pBAD/SS02, C-terminally Myc-His <sub>6</sub> -tag                         | This study |
| pET15-FtsZ                          | <i>ftsZ</i> cloned in pET-15b                                                                   | 9          |
| pET28-PNP                           | <i>pnp</i> cloned in pET-28b                                                                    | 10         |
| pCold-SecB                          | <i>secB</i> cloned in pCold I, N-terminal His <sub>6</sub> -tag                                 | This study |

<sup>a</sup>Ap<sup>R</sup>, ampicillin-resistance; Cm<sup>R</sup>, chloramphenicol-resistance; Km<sup>R</sup>, kanamycin-resistance.

**Supplementary Table 2. Oligonucleotide primers used in this study**

| Primers         | Sequence (5' to 3') <sup>a</sup>                                | Description                                                                    |
|-----------------|-----------------------------------------------------------------|--------------------------------------------------------------------------------|
| dnaK-K70A-F     | ACACTCTGTTTGCATTGCACGCCTGATTGGTTCG                              | For introduction of the substitution of Lys-70 to Ala in DnaK, forward primer  |
| dnaK-K70A-R     | CGACCAATCAGGCGTGCAATCGCAAACAGAGTGT                              | For introduction of the substitution of Lys-70 to Ala in DnaK, reverse primer  |
| dnaK-V436F-F    | GACAACCAGTCTGCGTTCACCATCCATGTGCTGC                              | For introduction of the substitution of Val-436 to Phe in DnaK, forward primer |
| dnaK-V436F-R    | GCAGCACATGGATGGTGAACGCAGACTGGTTGTC                              | For introduction of the substitution of Val-436 to Phe in DnaK, reverse primer |
| pCA24N-Art-F    | GTCGACCTGCAGCCAAGCTTAATTAGC                                     | For linearization of the empty vector pCA24N, forward primer                   |
| pCA24N-Art-R    | CAATTTACACAGAATTCATTAAGAGGAGAAATTAAGTATG                        | For linearization of the empty vector pCA24N, reverse primer                   |
| rpoS-Art-F      | GAGAAATTAAGTATGATGAGTCAGAATACGCTGAAAGTTCATGATTTAAATG            | For cloning of the intact <i>rpoS</i> gene into pCA24N, forward primer         |
| rpoS-Art-R      | TGGCTGCAGGTCGACTTACTCGCGGAACAGCGCTTCGATATTC                     | For cloning of the intact <i>rpoS</i> gene into pCA24N, reverse primer         |
| rpoS-mcherry-R  | TGGCTGCAGGTCGACTTACTTGTACAGCTCGTCCATGCCGC                       | For cloning of the <i>rpoS-mcherry</i> gene into pCA24N, reverse primer        |
| mcherry-inv-F   | GAGAAATTAAGTATGAAGGGCGAGGAGGATAACATGGCCATCATC                   | For deletion of <i>rpoS</i> from pRpoS-mCherry, forward primer                 |
| mcherry-inv-R   | ATCCTCCTCGCCCTTCATAGTTAATTTCTCCTCTTTAATGAATTCTGTGTGAAATTGTTATCC | For deletion of <i>rpoS</i> from pRpoS-mCherry, reverse primer                 |
| csgD-Art-F      | GAGAAATTAAGTATGTTTAATGAAGTCCATAGTATTCATGGTCATAC                 | For cloning of <i>csgD</i> into pCA24N, forward primer                         |
| csgD-Art-R      | TGGCTGCAGGTCGACTTATCGCCTGAGGTTATCGTTTTG                         | For cloning of <i>csgD</i> into pCA24N, reverse primer                         |
| csgG-Art-R      | TGGCTGCAGGTCGACTCAGGATTCCGGTGAACCGAC                            | For cloning of <i>csgDEFG</i> and <i>csgBAEFG</i> into pCA24N, reverse primer  |
| csgB-Art-F      | GAGAAATTAAGTATGAAAAACAAATTGTTATTTATGATGTTAACAATACTGGGTGCG       | For cloning of <i>csgBAEFG</i> into pCA24N, forward primer                     |
| csgA-Art-R      | TTAGTACTGATGAGCGGTGCGTGTGTTAC                                   | For cloning of <i>csgBAEFG</i> into pCA24N, reverse primer                     |
| csgA-Art-F      | GAGAAATTAAGTATGAAACTTTTAAAAGTAGAAGCAATTGCAGCAATCG               | For cloning of <i>csgA-His</i> into pCA24N, forward primer                     |
| csgA-His5-Art-R | TGGCTGCAGGTCGACTTAATGATGATGATGGTACTGATGAGCGGTGCGTGTGTTACC       | For cloning of <i>csgA-His</i> into pCA24N, reverse primer                     |
| csgE-Art-F      | GCTCATCAGTACTAAACACAAGCGGTTTCCTGGGCAA                           | For cloning of <i>csgBAEFG</i> into pCA24N, forward primer                     |
| csgD*-F         | CGTATCGGCGGTCTAATCTTTTCAAGAAG                                   | For deletion of the DNA-binding domain coding region from                      |

|                      |                                                                 |                                                                                                                |
|----------------------|-----------------------------------------------------------------|----------------------------------------------------------------------------------------------------------------|
|                      |                                                                 | pCsgDEFG, forward primer                                                                                       |
| csgD*-R              | CTTCTTGAAAAGATTAGACGCGCCGATACG                                  | For deletion of the DNA-binding domain coding region from pCsgDEFG, reverse primer                             |
| pBAD33-3000-F        | ATCCCTTAACGTGAGTTCCGAAGGTAAGTGGCTTCAGCAGAGC                     | For construction of pBAD/SS01, forward primer                                                                  |
| pBAD33-1-R           | TGATGACGGTGAAAAGTCCATTTGACAGGCACATTATGCATCG                     | For construction of pBAD/SS01, reverse primer                                                                  |
| pBAD/Myc-His-3033-F  | TTTTACCGTCATCACCGAAACGCGCG                                      | For construction of pBAD/SS01, forward primer                                                                  |
| pBAD/Myc-His-1959-R  | CTCACGTTAAGGGATTTGGTCATGAGATTATC                                | For construction of pBAD/SS01, reverse primer                                                                  |
| pBAD33-delta-CP-F    | GGCGTTTAAGGGCACCAATAACTGCCTTATGGTGAAAGTTGGAACCTCTTACGTGCC       | For construction of pBAD/SS02, for deletion of the Cm <sup>R</sup> cassette from pBAD/SS01, forward primer     |
| pBAD33-delta-CP-R    | GGCACGTAAGAGGTTCCAACCTTTCACCATAAGGCAGTTATTGGTGCCCTTAAACGCC      | For construction of pBAD/SS02, for deletion of the Cm <sup>R</sup> cassette from pBAD/SS01, reverse primer     |
| pBAD-mcs-F           | CGAAGCTTTCTAGAACAAAACTCATCTCAGAAG                               | For linearization of pBAD/SS02, forward primer                                                                 |
| pBAD-mcs-R           | GGTTAATTCCTCCTGTTAGCCCAAAAAACGG                                 | For linearization of pBAD/SS02, reverse primer                                                                 |
| sfGFP-Art-F          | CAGGAGGAATTAACCATGTGCGAAAGGCGAAGAAGTGTTCACCGG                   | For cloning of <i>sfGFP</i> into pBAD/SS02, forward primer                                                     |
| sfGFP-Art-R          | TTCTAGAAAGCTTCGTTTATACAGCTCATCCATACCATGCGTAATCCC                | For cloning of <i>sfGFP</i> into pBAD/SS02, reverse primer                                                     |
| pBAD-sfGFP-inverse-F | AGCGATTTTATGTGCGAAAGGCGAAGAAGTGTTCACCGG                         | For linearization of pBAD-sfGFP, forward primer                                                                |
| pBAD-csgB-Art-F      | CAGGAGGAATTAACCATGAAAAACAATTGTTATTTATGATGTTAACAATACTGGGTGCG     | For cloning of <i>csgBA</i> into pBAD-sfGFP, forward primer                                                    |
| pBAD-csgA-Art-R      | CGACATAAAATCGCTGTACTGATGAGCGGTGCGTGTGTTACC                      | For cloning of <i>csgBA</i> into pBAD-sfGFP, reverse primer                                                    |
| csgA1-42-sfGFP-F     | AATAGCGGCCCAAATAGCGATTTTATGTGCGAAAGGCGAAGAAC                    | For construction of pBAD-CsgBA <sub>1-42</sub> -sfGFP, forward primer                                          |
| csgA1-42-sfGFP-R     | CGACATAAAATCGCTATTTGGGCCGCTATTATTACCGCCACC                      | For construction of pBAD-CsgBA <sub>1-42</sub> -sfGFP, reverse primer                                          |
| csgA1-20-sfGFP-F     | GGTAGCGCTCTGGCAAGCGATTTTATGTGCGAAAGGCGAAGAAC                    | For construction of pBAD-CsgBA <sub>1-20</sub> -sfGFP, forward primer                                          |
| csgA1-20-sfGFP-R     | CGACATAAAATCGCTTGCCAGAGCGCTACCGGAGAATACGATTG                    | For construction of pBAD-CsgBA <sub>1-20</sub> -sfGFP, reverse primer                                          |
| csgA43-151-sfGFP-F   | GAGGAATTAACCATGTCTGAGCTGAACATTTACCAGTACGGTGG                    | For construction of pBAD-CsgBA <sub>43-151</sub> -sfGFP, forward primer                                        |
| csgA43-151-sfGFP-R   | AATGTTTCAGCTCAGACATGGTTAATTCCTCCTGTTAGCCCAAAAAAC                | For construction of pBAD-CsgBA <sub>43-151</sub> -sfGFP, reverse primer                                        |
| csgA21-151-sfGFP-F   | GAGGAATTAACCATGGGTGTTGTTTCCTCAGTACGGCGGCGG                      | For construction of pBAD-CsgBA <sub>21-151</sub> -sfGFP and pBAD-CsgBA <sub>21-42</sub> -sfGFP, forward primer |
| csgA21-151-sfGFP-R   | CTGAGGAACAACACCCATGGTTAATTCCTCCTGTTAGCCCAAAAAAC                 | For construction of pBAD-CsgBA <sub>21-151</sub> -sfGFP and pBAD-CsgBA <sub>21-42</sub> -sfGFP, reverse primer |
| Q49A_N54A-F          | TAC <u>G</u> CATACGGTGGCGGT <u>G</u> CATCTGCACTTGCTCTGCAAAGTATG | For introduction of the substitutions of Gln-49 to Ala and Asn-54 in CsgA, forward primer                      |

|                    |                                                                              |                                                                                               |
|--------------------|------------------------------------------------------------------------------|-----------------------------------------------------------------------------------------------|
| Q49A_N54A-R        | AGAT <u>G</u> CACCGCCACCGTAT <u>G</u> CGTAAATGTTTCAGCTCAGAATTTGGG            | For introduction of the substitutions of Gln-49 to Ala and Asn-54 in CsgA, reverse primer     |
| Q139A_N144A-F      | CGTGACT <u>G</u> CAGTTGGCTTTGGT <u>G</u> CAAACGCGACCGCTCATCAGTACAG           | For introduction of the substitutions of Gln-139 to Ala and Asn-144 in CsgA, forward primer   |
| Q139A_N144A-R      | GCGTTT <u>G</u> CACCAAAGCCAAC <u>T</u> G <u>C</u> AGTCACGTTGACGGAGGAGTTAGATG | For introduction of the substitutions of Gln-139 to Ala and Asn-144 in CsgA, reverse primer   |
| csgB-csgA-inter-F  | TAATTTCCATTCGACTTTTAAATCAATCCGATGGG                                          | For construction of pBAD-CsgB-mCherry/CsgA-sfGFP, forward primer                              |
| csgB-csgA-inter-R  | ACGTTGTGTCACGCGAATAGCCATTTG                                                  | For construction of pBAD-CsgB-mCherry/CsgA-sfGFP, reverse primer                              |
| csgB-mcherry-Art-F | TCGCGTGACACAACGTAAGGGCGAGGAGGATAACATGGCC                                     | For construction of pBAD-CsgB-mCherry/CsgA-sfGFP, forward primer                              |
| csgB-mcherry-Art-R | GTCGAATGGAAATTACTTGTACAGCTCGTCCATGCCGC                                       | For construction of pBAD-CsgB-mCherry/CsgA-sfGFP, reverse primer                              |
| secB-ArtF          | GAAGGTAGGCATATGTCAGAACAAAACAACACTGAAATGACTTTCC                               | Cloning of <i>secB</i> into pCold I, forward primer                                           |
| secB-Art-R         | AGAGATTACCTATCTTCAGGCATCCTGATGTTCTTCAGTACCTTC                                | Cloning of <i>secB</i> into pCold I, reverse primer                                           |
| Pure-Niwa-F        | GGCCTAATACGACTCACTATAGGAGAAATCATAAAAAATTTATTTGCTTTGTGAGCGG                   | For in vitro translation using PURE System, forward primer                                    |
| Pure-CsgD-R        | GTTATTGCTCAGCGGTTAGCGGCCGCATAGGCC                                            | For in vitro translation of CsgD using PURE System, reverse primer                            |
| csgB-UTR-Alexa-F   | GATAACAGCGTATTTACGTGGGTTTTAATACTTTGG                                         | For gel-shift analysis, amplification of Alexa488-labeled <i>csgB</i> promoter forward primer |
| csgB-UTR-R         | ACGCAACCTGTATTTTGTAAACGCTGC                                                  | For gel-shift analysis, amplification of Alexa488-labeled <i>csgB</i> promoter reverse primer |
| RT-csgA-F          | TCTGGCAGGTGTTGTTCCCTC                                                        | For RT-PCR, forward primer                                                                    |
| RT-csgA-R          | CCACCACCATGCTGGGTAAT                                                         | For RT-PCR, reverse primer                                                                    |
| RT-csgD-F          | TCTCGTTATTAGACGCGCCG                                                         | For RT-PCR, forward primer                                                                    |
| RT-csgD-R          | CAATGGATTGCAAGGCGTCC                                                         | For RT-PCR, reverse primer                                                                    |

<sup>a</sup> Underlines, mutation sites.

## SUPPLEMENTARY DISCUSSION

### Biofilm quantification data

We compared growth of *E. coli* BW25113 wild type and  $\Delta dnaK$  on LB plates and LB liquid media and found that there was no remarkable difference between at least these strains (Fig. 1f and data not shown). Therefore, normalization of biofilm biomass by cell growth (optical density or colony forming units) was not performed in this study.

### Microarray data

We summarized microarray data of previously reported RpoS-regulated genes<sup>1</sup> and RpoH-regulated genes<sup>2</sup> in Fig. 2c. Full data set is also shown in Supplementary Data 1. Expression of many, but not all, genes positively regulated by RpoS was decreased in  $\Delta dnaK$  compared to wild type. Given that a few soluble RpoS is present in  $\Delta dnaK$  (Fig. 3b), some of the unaffected genes may be regulated by small but enough amount of active RpoS. It is also likely that expression of these genes may be independent on RpoS under the conditions tested in this study (in YESCA medium at 30°C for 48 h), since culture conditions affect the RpoS-dependency<sup>1,3</sup>.

### Cellular localization and aggregation analyses using fluorescent proteins

To visualize cellular localization and protein aggregates, we used mCherry and sfGFP. As shown in Fig. 6b and Supplementary Fig. 6, no aggregation of these proteins was observed. Therefore, aggregates of RpoS-mCherry and CsgA-sfGFP derivatives formed in *dnaK* cells were likely not due to the fusion of these fluorescent proteins. The fluorescent fusion proteins can be prone to aggregation and the foci visualized may not be the real foci but instead are demonstrating the underlying trend that the  $\Delta dnaK$  strain has more aggregates. The RpoS data is supported by fractionation (Fig. 3).

## SUPPLEMENTARY METHODS

## **Protein purification**

C-terminal Myc-His tagged CsgD (CsgD-Myc-His) was purified as follows. *E. coli* BL21 (DE3) harboring pBAD-CsgD-Myc-His was cultured in 20 mL LB medium containing 100 µg/mL ampicillin overnight at 30°C with shaking at 150 rpm. Cultures were diluted in 1-L LB medium supplemented with 100 µg/mL ampicillin and incubated at 30°C with shaking at 100 rpm. When optical density at 660 nm reached 0.5, the culture was supplemented with 0.02% arabinose followed by overnight incubation at 15°C. After centrifugation at 6,000 × *g* for 20 min at 4°C, harvested cells were resuspended in 50 mL buffer A supplemented with protease inhibitor cocktail. After sonication on ice, cell lysates were centrifuged at 9,400 × *g* for 30 min at 4°C, and the supernatant was loaded onto a 1-mL bed volume of TALON resin, which was washed with buffer A supplemented with 5 mM imidazole; recombinant proteins were then eluted with 250 mM imidazole. Since the eluted fractions formed aggregates, insoluble proteins were pelleted by centrifugation at 20,000 × *g* for 10 min at 4°C and washed with buffer D [10 mM Tris-HCl (pH 8.0), 1% (w/v) Nonidet P-40, and 500 mM NaCl]. Following centrifugation at 20,000 × *g* for 10 min at 4°C, insoluble proteins were incubated overnight at room temperature in buffer E [10 mM Tris-HCl (pH 8.0), and 8 M urea], centrifuged at 20,000 × *g* for 10 min at room temperature, and solubilized in buffer F [50 mM Tris-HCl (pH 8.0), 6 M Guanidine-HCl (Gdn-HCl), and 200 mM NaCl] at room temperature for 1 h before purification using TALON resin under denature conditions. The resin was washed with buffer F supplemented with 10 mM imidazole, and recombinant proteins were eluted using buffer F supplemented with 250 mM imidazole. Eluted fractions were pooled and dialyzed overnight at 4°C against buffer G [10 mM Tris-HCl (pH 8.0), 10 mM MgCl<sub>2</sub>, 100 mM KCl, and 1 mM DTT] supplemented with 6 M Gdn-HCl, overnight at 4°C in buffer G supplemented with 2 M Gdn-HCl and 400 mM L-arginine-HCl, for 5 h at 4°C in buffer G supplemented with 1 M Gdn-HCl and 400 mM L-arginine-HCl, and overnight at 4°C in buffer G supplemented with 400 mM L-arginine-HCl and 20% glycerol using the Slide-A-Lyzer Dialysis Cassette (Thermo Fisher Scientific). Purified CsgD-Myc-His was quantified with the



Bradford Assay Kit.

N-terminally His<sub>6</sub>-tagged SecB (His-SecB) was expressed in *E. coli* BL21(DE3). Cells harboring pCold-SecB were grown at 30°C in LB medium containing 100 µg/mL ampicillin, and expression of His-SecB was induced by the adding IPTG (0.1 mM) and incubating overnight at 15°C. Cells from 2-L culture were harvested by centrifugation and resuspended in 50 mL buffer A supplemented with a protease inhibitor cocktail. After sonication on ice, cell lysates were centrifuged at 9,000 × *g* for 30 min at 4°C, and the supernatant was loaded onto a 2-mL bed volume of TALON resin that was washed with buffer A supplemented with 5 mM imidazole. Recombinant proteins were eluted using 250 mM imidazole. Eluted fractions were dialyzed against buffer B using Slide-A-Lyzer Dialysis Cassette and purified by chromatography using a HiTrap Q column (GE Healthcare) and a 0–1,000 mM NaCl gradient in buffer B. Each fraction containing His-SecB was pooled and further purified by size exclusion chromatography (Superdex G-75 Increase 10/300 GL; GE Healthcare) in buffer C. Purified His-SecB was pooled and quantified using a Bradford Assay Kit.

### **Catalase activity assay**

Catalase activity in overnight cultures was measured as previously described<sup>4</sup> with minor modifications. Bacteria were grown in 5 mL LB medium without supplementation or supplemented with 30 µg/mL chloramphenicol at 30°C for 16 h with shaking under aerobic conditions. Bacterial cells were harvested by centrifugation at 8,000 × *g* for 20 min and suspended in 1 mL PBS supplemented with 1% Triton X-100. A 200 µL volume of the solutions was mixed with 200 µL undiluted hydrogen peroxide (30%) and incubated at room temperature for 5 min before measuring the height of O<sub>2</sub>-forming foam.

### **SUPPLEMENTARY REFERENCES**

1. Vijayakumar, S. R., Kirchhof, M. G., Patten, C. L. & Schellhorn, H.E. RpoS-regulated genes of *Escherichia coli* identified by random *lacZ* fusion mutagenesis. *J. Bacteriol.* **186**, 8499–8507 (2004).
2. Guisbert, E., Yura, T., Rhodius, V. A. & Gross, C. A. Convergence of molecular,

modeling, and systems approaches for an understanding of the *Escherichia coli* heat shock response. *Microbiol. Mol. Biol. Rev.* **72**, 545–554 (2008).

3. Dong, T., Kirchhof, M. G. & Schellhorn, H. E. RpoS regulation of gene expression during exponential growth of *Escherichia coli* K12. *Mol. Genet. Genomics.* **279**, 267–277 (2008).
4. Iwase, T., Tajima, A., Sugimoto, S., Okuda, K., Hironaka, I., Kamata, Y., Takada, K. & Mizunoe, Y. A simple assay for measuring catalase activity: a visual approach. *Sci. Rep.* **3**, 3081 (2013).
5. Casadaban, M. J. Transposition and fusion of the lac genes to selected promoters in *Escherichia coli* using bacteriophage lambda and Mu. *J. Mol. Biol.* **104**, 541–555 (1976).
6. Bukau, B. & Walker, G. C. Cellular defects caused by deletion of the *Escherichia coli* dnaK gene indicate roles for heat shock protein in normal metabolism. *J. Bacteriol.* **171**, 2337–2346 (1989).
7. Baba, T., Ara, T., Hasegawa, M., Takai, Y., Okumura, Y., Baba, M., Datsenko, K. A., Tomita, M., Wanner, B.L. & Mori, H. Construction of *Escherichia coli* K-12 in-frame, single-gene knockout mutants: the Keio collection. *Mol. Syst. Biol.* **2**, 2006.0008 (2006).
8. Kitagawa, M., Ara, T., Arifuzzaman, M., Ioka-Nakamichi, T., Inamoto, E., Toyonaga, H. & Mori, H. Complete set of ORF clones of *Escherichia coli* ASKA library (a complete set of *E. coli* K-12 ORF archive): unique resources for biological research. *DNA Res.* **12**, 291–299 (2005).
9. Sugimoto, S., Yamanaka, K., Nishikori, S., Miyagi, A., Ando, T. & Ogura, T. AAA+ chaperone ClpX regulates dynamics of prokaryotic cytoskeletal protein FtsZ. *J. Biol. Chem.* **285**, 6648–6657 (2010).
10. Sugimoto, S., Arita-Morioka, K., Mizunoe, Y., Yamanaka, K. & Ogura, T. Thioflavin T as a fluorescence probe for monitoring RNA metabolism at molecular and cellular levels. *Nucleic Acids Res.* **43**, e92 (2015).
